# Supplementary material for: Genetic risk variants for brain disorders are enriched in cortical H3K27ac domains
Source: Springer Nature journal article supplement (doi:10.1186/s13041-019-0429-4), 2019-01-28
Supplement: MOESM1 [file 25663638]

| <b>Disease / Trait</b>              | <b>Reference</b>                                                                                                                                                                                                                    | <b>Sample Size</b>                 | <b>Number of significant loci / SNPs</b> | <b>Primary cohort ethnicity</b>           |
|-------------------------------------|-------------------------------------------------------------------------------------------------------------------------------------------------------------------------------------------------------------------------------------|------------------------------------|------------------------------------------|-------------------------------------------|
| ADHD                                | Demontis D, Walters RK, Martin J, Mattheisen M, Als TD, Agerbo E, et al. Discovery Of The First Genome-Wide Significant Risk Loci For ADHD. Nat. Genet. 2018 (15)                                                                   | 20,183 cases and 35,191 controls   | 304 SNPs (12 loci)                       | Danish, European, North American, Chinese |
| Alzheimer's Disease                 | Lambert JC, Ibrahim-Verbaas CA, Harold D, Naj AC, Sims R, Bellenguez C, et al. Meta-analysis of 74,046 individuals identifies 11 new susceptibility loci for Alzheimer's disease. Nat Genet. 2013;45(12):1452-8 (1)                 | 17,008 cases and 37,154 controls;  | 20 loci                                  | European Ancestry                         |
| Autism                              | Grove J, Ripke S, Als TD, Mattheisen M, Walters R, Won H, et al. Common risk variants identified in autism spectrum disorder. bioRxiv. 2017 (16)                                                                                    | 18,381 cases and 27969 controls    | 3 loci                                   | Danish, European                          |
| Amyotrophic lateral sclerosis (ALS) | van Rheenen W, Shatunov A, Dekker AM, McLaughlin RL, Diekstra FP, Pulit SL, et al. Genome-wide association analyses identify new risk variants and the genetic architecture of amyotrophic lateral sclerosis. Nat Genet. 2016 (2)   | 12,577 cases and 23,475 controls   | 7 loci                                   | European Ancestry                         |
| Major depressive disorder           | Wray NR, Ripke S, Mattheisen M, Trzaskowski M, Byrne EM, Abdellaoui A, et al. Genome-wide association analyses identify 44 risk variants and refine the genetic architecture of major depression. Nat Genet. 2018;50(5):668-81. (7) | 135,458 cases and 344,901 controls | 44 loci                                  | European Ancestry                         |
| Bipolar disorder                    | Psychiatric GWAS Consortium Bipolar Disorder Working Group. Large-scale genome-wide association analysis                                                                                                                            | 7,481 cases and                    | 4 loci                                   | German, European-American, British,       |

|                       |                                                                                                                                                                                                                                              |                                   |                     |                                                                                                                 |
|-----------------------|----------------------------------------------------------------------------------------------------------------------------------------------------------------------------------------------------------------------------------------------|-----------------------------------|---------------------|-----------------------------------------------------------------------------------------------------------------|
|                       | of bipolar disorder identifies a new susceptibility locus near ODZ4. Nat Genet. 2011;43(10):977-83. (5)                                                                                                                                      | 9,250 controls                    |                     | Canadian, Scottish, Norwegian, Irish, British                                                                   |
| Schizophrenia         | Schizophrenia Working Group of the PGC, Ripke S, Neale B, Corvin A, Walters J, Farh K, et al. Biological insights from 108 schizophrenia-associated genetic loci. Nature. 2014;511(7510):421-+. (4)                                          | 36,989 cases and 113,075 controls | 108 loci            | European, East Asian                                                                                            |
|                       | Pardiñas AF, Holmans P, Pocklington AJ, Escott-Price V, Ripke S, Carrera N, et al. Common schizophrenia alleles are enriched in mutation-intolerant genes and in regions under strong background selection. Nat Genet. 2018;50(3):381-9. (6) | 11,260 cases and 24,542 controls  | 179 SNPS (145 loci) | European Ancestry                                                                                               |
|                       | Schizophrenia Working Group of the PGC, Ripke S, Sanders A, Kendler K, Levinson D, Sklar P, et al. Genome-wide association study identifies five new schizophrenia loci. Nat Genet. 2011;43(10):969-U77. (17)                                | 9,394 cases and 12,462 controls   | 7 loci              | European Ancestry (UK, USA, UK, Bulgaria, Ireland, Portugal, Sweden, Germany, Denmark, Norway, The Netherlands) |
| Birth length          | van der Valk RJ, Kreiner-Møller E, Kooijman MN, Guxens M, Stergiakouli E, Sääf A, et al. A novel common variant in DCST2 is associated with length in early life and height in adulthood. Hum Mol Genet. 2015;24(4):1155-68. (18)            | 28,459                            | 7 SNPs              | Multiple                                                                                                        |
| Body mass index (BMI) | Locke AE, Kahali B, Berndt SI, Justice AE, Pers TH, Day FR, et al. Genetic studies of body mass index yield new insights for obesity biology. Nature. 2015;518(7538):197-206. (19)                                                           | 322,154                           | 77 loci             | European Ancestry                                                                                               |
|                       | Yengo L, Sidorenko J, Kemper KE, Zheng Z, Wood AR, Weedon MN, et al. Meta-analysis of genome-wide association studies for height and body mass index in ~700,000 individuals of European ancestry. bioRxiv. 2018. (20)                       | 681,275                           | 716 SNPs (416 loci) | European Ancestry                                                                                               |

|                        |                                                                                                                                                                                                                                                     |                                   |                       |                                                                                  |
|------------------------|-----------------------------------------------------------------------------------------------------------------------------------------------------------------------------------------------------------------------------------------------------|-----------------------------------|-----------------------|----------------------------------------------------------------------------------|
| Height                 | Yengo L, Sidorenko J, Kemper KE, Zheng Z, Wood AR, Weedon MN, et al. Meta-analysis of genome-wide association studies for height and body mass index in ~700,000 individuals of European ancestry. bioRxiv. 2018. (20)                              | 693,529                           | 3,290 SNPs (712 loci) | European Ancestry                                                                |
|                        | Wood AR, Esko T, Yang J, Vedantam S, Pers TH, Gustafsson S, et al. Defining the role of common variation in the genomic and biological architecture of adult human height. Nat Genet. 2014;46(11):1173-86. (21)                                     | 253,288                           | 423 loci              | European Ancestry                                                                |
| Cigarettes per day     | Tobacco and Genetics Consortium. Genome-wide meta-analyses identify multiple loci associated with smoking behavior. Nat Genet. 2010;42(5):441-7. (22)                                                                                               | 74,053                            | 3 loci                | European Ancestry                                                                |
| Ever smoked            | Tobacco and Genetics Consortium. Genome-wide meta-analyses identify multiple loci associated with smoking behavior. Nat Genet. 2010;42(5):441-7. (22)                                                                                               | 74,053                            | 8 SNPs                | European Ancestry                                                                |
| Coronary Heart Disease | CARDIoGRAMplusC4D Consortium, Nikpay M, Goel A, Won HH, Hall LM, Willenborg C, et al. A comprehensive 1,000 Genomes-based genome-wide association meta-analysis of coronary artery disease. Nat Genet. 2015;47(10):1121-30. (23)                    | 60,801 cases and 123,504 controls | 55 loci               | European Ancestry, Indian, Pakistani, Chinese, Korean, Hispanic African American |
| Crohn's disease        | Liu JZ, van Sommeren S, Huang H, Ng SC, Alberts R, Takahashi A, et al. Association analyses identify 38 susceptibility loci for inflammatory bowel disease and highlight shared genetic risk across populations. Nat Genet. 2015;47(9):979-86. (24) | 5956 cases and 14927 controls     | 38 loci               | European Ancestry                                                                |
| IBD                    | Liu JZ, van Sommeren S, Huang H, Ng SC, Alberts R, Takahashi A, et al. Association analyses identify 38 susceptibility loci for inflammatory bowel disease and highlight shared genetic risk across populations. Nat Genet. 2015;47(9):979-86. (24) | 12882 cases 21770 controls        |                       | European Ancestry                                                                |

|                                |                                                                                                                                                                                                                                                            |                                  |         |                                                                                 |
|--------------------------------|------------------------------------------------------------------------------------------------------------------------------------------------------------------------------------------------------------------------------------------------------------|----------------------------------|---------|---------------------------------------------------------------------------------|
| Ulcerative colitis             | Liu JZ, van Sommeren S, Huang H, Ng SC, Alberts R, Takahashi A, et al. Association analyses identify 38 susceptibility loci for inflammatory bowel disease and highlight shared genetic risk across populations. <i>Nat Genet.</i> 2015;47(9):979-86. (24) | 6968 cases and 20464 controls    |         | European Ancestry and non-European (including East Asian, South Asian, African) |
| High Density Lipoprotein (HDL) | Global Lipids Genetics Consortium, Willer CJ, Schmidt EM, Sengupta S, Peloso GM, Gustafsson S, et al. Discovery and refinement of loci associated with lipid levels. <i>Nat Genet.</i> 2013;45(11):1274-83. (25)                                           | 188,577                          | 60 loci | European Ancestry and non-European (including East Asian, South Asian, African) |
| Low Density Lipoprotein (LDL)  | Global Lipids Genetics Consortium, Willer CJ, Schmidt EM, Sengupta S, Peloso GM, Gustafsson S, et al. Discovery and refinement of loci associated with lipid levels. <i>Nat Genet.</i> 2013;45(11):1274-83. (25)                                           |                                  | 30 loci | European Ancestry and non-European (including East Asian, South Asian, African) |
| Total Cholesterol              | Global Lipids Genetics Consortium, Willer CJ, Schmidt EM, Sengupta S, Peloso GM, Gustafsson S, et al. Discovery and refinement of loci associated with lipid levels. <i>Nat Genet.</i> 2013;45(11):1274-83. (25)                                           |                                  | 49 loci | European Ancestry and non-European (including East Asian, South Asian, African) |
| Triglycerides                  | Global Lipids Genetics Consortium, Willer CJ, Schmidt EM, Sengupta S, Peloso GM, Gustafsson S, et al. Discovery and refinement of loci associated with lipid levels. <i>Nat Genet.</i> 2013;45(11):1274-83. (25)                                           |                                  | 28 loci | European Ancestry and non-European (including East Asian, South Asian, African) |
| Type 2 diabetes                | Morris AP, Voight BF, Teslovich TM, Ferreira T, Segre AV, Steinthorsdottir V, et al. Large-scale association analysis provides insights into the genetic architecture and pathophysiology of type 2 diabetes. <i>Nat Genet.</i> 2012;44(9):981-+. (26)     | 12,171 cases and 56,862 controls | 65 loci | European Ancestry                                                               |

**SUPPLEMENTARY TABLE 1. Details of the GWAS datasets used in this study.**
