# Supplementary material for: Genetic risk variants for brain disorders are enriched in cortical H3K27ac domains
Source: Springer Nature journal article supplement (doi:10.1186/s13041-019-0429-4), 2019-01-28
Supplement: MOESM2 [file 25663638]

| GWAS trait                        | Category  | Enrichment | SE    | No Correction |              | Correcting for 7 brain traits |                | Correcting for all 21 traits |                 |
|-----------------------------------|-----------|------------|-------|---------------|--------------|-------------------------------|----------------|------------------------------|-----------------|
|                                   |           |            |       | 95% CI Lower  | 95% CI Upper | 99.3% CI Lower                | 99.3% CI Upper | 99.64% CI Lower              | 99.64% CI Upper |
| ADHD (2017)                       | Brain     | 1.534      | 0.026 | 1.483         | 1.585        | 1.465                         | 1.603          | 1.456                        | 1.612           |
| ALS (2016)                        | Brain     | 2.199      | 0.038 | 2.125         | 2.274        | 2.097                         | 2.302          | 2.083                        | 2.315           |
| Alzheimer's disease (2013)        | Brain     | 1.097      | 0.026 | 1.047         | 1.148        | 1.028                         | 1.167          | 1.019                        | 1.176           |
| Autism (2017)                     | Brain     | 2.108      | 0.027 | 2.055         | 2.162        | 2.035                         | 2.181          | 2.025                        | 2.191           |
| Bipolar disorder (2012)           | Brain     | 1.836      | 0.022 | 1.793         | 1.879        | 1.778                         | 1.895          | 1.770                        | 1.902           |
| MDD (2012)                        | Brain     | 2.036      | 0.061 | 1.916         | 2.155        | 1.871                         | 2.200          | 1.850                        | 2.221           |
| Schizophrenia (2012)              | Brain     | 1.533      | 0.034 | 1.466         | 1.600        | 1.441                         | 1.625          | 1.429                        | 1.637           |
| Schizophrenia (2018)              | Brain     | 1.758      | 0.034 | 1.692         | 1.824        | 1.668                         | 1.848          | 1.656                        | 1.860           |
|                                   |           |            |       |               |              |                               |                |                              |                 |
| Birth Length (2015)               | Non-brain | 0.947      | 0.050 | 0.850         | 1.044        | 0.813                         | 1.080          | 0.796                        | 1.098           |
| BMI (2015)                        | Non-brain | 1.378      | 0.011 | 1.356         | 1.401        | 1.347                         | 1.409          | 1.343                        | 1.413           |
| Cigarettes per day (2010)         | Non-brain | 0.876      | 0.026 | 0.825         | 0.928        | 0.805                         | 0.947          | 0.796                        | 0.957           |
| Coronary artery disease (2014)    | Non-brain | 0.855      | 0.016 | 0.823         | 0.887        | 0.811                         | 0.899          | 0.805                        | 0.905           |
| Crohn's Disease (2015)            | Non-brain | 0.776      | 0.108 | 0.564         | 0.987        | 0.486                         | 1.066          | 0.448                        | 1.104           |
| Ever Smoked (2010)                | Non-brain | 2.067      | 0.016 | 2.035         | 2.099        | 2.023                         | 2.111          | 2.018                        | 2.117           |
| HDL (2013)                        | Non-brain | 1.533      | 0.044 | 1.447         | 1.619        | 1.415                         | 1.651          | 1.400                        | 1.667           |
| Height (2014)                     | Non-brain | 0.754      | 0.030 | 0.696         | 0.813        | 0.674                         | 0.835          | 0.664                        | 0.845           |
| Inflammatory bowel disease (2015) | Non-brain | 0.564      | 0.059 | 0.449         | 0.679        | 0.406                         | 0.722          | 0.385                        | 0.743           |
| LDL (2013)                        | Non-brain | 0.971      | 0.044 | 0.884         | 1.058        | 0.852                         | 1.091          | 0.836                        | 1.106           |

|                                  |                  |       |       |       |       |       |       |       |       |
|----------------------------------|------------------|-------|-------|-------|-------|-------|-------|-------|-------|
| <b>Total cholestrol (2013)</b>   | <b>Non-brain</b> | 1.053 | 0.053 | 0.950 | 1.157 | 0.911 | 1.195 | 0.893 | 1.214 |
| <b>Triglycerides (2013)</b>      | <b>Non-brain</b> | 1.329 | 0.044 | 1.242 | 1.416 | 1.210 | 1.448 | 1.195 | 1.463 |
| <b>Type 2 diabetes (2012)</b>    | <b>Non-brain</b> | 0.372 | 0.021 | 0.330 | 0.413 | 0.315 | 0.429 | 0.307 | 0.436 |
| <b>Ulceritive colitus (2015)</b> | <b>Non-brain</b> | 0.406 | 0.056 | 0.296 | 0.516 | 0.255 | 0.557 | 0.235 | 0.577 |

**SUPPLEMENTARY TABLE 2. Enrichments for all seven brain traits remained significant when correcting for the number of independent tests performed.**
